# Supplementary material
Source: PubMed Central journal article supplement (PMC4851172)
Supplement: NIHMS726616-supplement-S.pdf [file NIHMS726616-supplement-S.pdf]

## SUPPLEMENT TO “GLOBAL SOLUTIONS TO FOLDED CONCAVE PENALIZED NONCONVEX LEARNING”

BY HONGCHENG LIU\*, TAO YAO\* AND RUNZE LI†

*The Pennsylvania State University*

**S1. Proof of Proposition 2.1.** Notice that (2.1) admits a closed-form representation given as:

$$\begin{aligned}
P_\lambda(\theta) &= \begin{cases} \lambda\theta & \text{if } 0 \leq \theta \leq \lambda \\ \lambda^2 + \frac{1}{a-1}[\frac{\lambda^2}{2}(1-2a) + a\lambda\theta - \frac{1}{2}\theta^2] & \text{if } \lambda < \theta \leq a\lambda \\ \lambda^2 + \frac{1}{a-1}[\frac{\lambda^2}{2}(1-2a) + \frac{1}{2}a^2\lambda^2] & \text{if } \theta > a\lambda \end{cases} \\
\text{(S1.1)} \quad &= \begin{cases} \lambda\theta & \text{if } 0 \leq \theta \leq \lambda \\ \frac{1}{a-1}[-\frac{\lambda^2}{2} + a\lambda\theta - \frac{1}{2}\theta^2] & \text{if } \lambda < \theta \leq a\lambda \\ \frac{1}{2}(a+1)\lambda^2 & \text{if } \theta > a\lambda \end{cases}
\end{aligned}$$

Let  $F(\cdot) : \mathbb{R}_+ \rightarrow \mathbb{R}$  be defined as

$$F(\theta) := \min_{\kappa \in [0, \lambda]} \left\{ (\theta - a\lambda)\kappa + \frac{1}{2}(a-1)\kappa^2 \right\} + \frac{a+1}{2}\lambda^2.$$

We next show that  $F(\theta) = P_\lambda(\theta)$  for any  $\theta \geq 0$ . Observe that

$$\begin{aligned}
\text{(S1.2)} \quad F(\theta) &= \min_{\kappa \in [0, \lambda]} \left\{ \frac{1}{2}(a-1) \left( \frac{(\theta - a\lambda)\kappa}{\frac{1}{2}(a-1)} + \kappa^2 \right) \right\} + \frac{a+1}{2}\lambda^2 \\
&= \min_{\kappa \in [0, \lambda]} \left\{ \frac{1}{2}(a-1) \left( \frac{\theta - a\lambda}{a-1} + \kappa \right)^2 - \frac{\theta^2 - 2a\lambda\theta + \lambda^2}{2(a-1)} \right\}
\end{aligned}$$

Further notice that the unique minimizer  $\kappa^*$  of  $\min_{\kappa \in [0, \lambda]} \{ (\theta - a\lambda)\kappa + \frac{1}{2}(a-1)\kappa^2 \}$  is

$$\kappa^* = \begin{cases} -\frac{\theta - a\lambda}{a-1} & \text{if } 0 \leq -\frac{\theta - a\lambda}{a-1} \leq \lambda \\ 0 & \text{if } -\frac{\theta - a\lambda}{a-1} \leq 0 \\ \lambda & \text{if } -\frac{\theta - a\lambda}{a-1} \geq \lambda \end{cases}$$

---

\*Support by Penn State GraceWoodward Collaborative Engineering/Medicine Research Grant.

†Support by National Science Foundation DMS 1512422 and National Institute of Health grants P50 DA036107 and P50 DA039838.

Equivalently,

$$(S1.3) \quad \kappa^* = \begin{cases} -\frac{\theta-a\lambda}{a-1} & \text{if } \lambda \leq \theta \leq a\lambda \\ 0 & \text{if } \theta \geq a\lambda \\ \lambda & \text{if } \theta \leq \lambda \end{cases}$$

Eq. (S1.3) provides a closed-form solution to the single variable minimization problem involved in (S1.2). Therefore, we can equivalently rewrite  $F(\theta)$  into

$$(S1.4) \quad F(\theta) = (\theta - a\lambda)\kappa^* + \frac{1}{2}(a-1)(\kappa^*)^2 + \frac{a+1}{2}\lambda^2.$$

Combining (S1.1), (S1.3), and (S1.4) immediately gives us the equality,  $F(\theta) = P_\lambda(\theta)$ . Therefore, Model (1.1) is equivalent to

$$\begin{aligned} & \min_{\beta \in \Lambda} \frac{1}{2}\beta^\top Q\beta + q^\top \beta \\ & + n \sum_{i=1}^d \min_{g_i \in [0, \lambda]} \left\{ (|\beta_i| - a\lambda) \cdot g_i + \frac{1}{2}(a-1) \cdot g_i^2 \right\} + n \frac{a+1}{2}\lambda^2 d. \end{aligned}$$

which immediately provides the desired result in Part (a).

As to Part (b), comparing (S1.3) and (2.1), we immediately have  $\kappa^* = P'_\lambda(\theta)$ , which is the desired result.

**S2. Proof for Proposition 2.3.** This proof follows a closely similar argument to the proof for Proposition 2.1 in Appendix S1. Notice that, per (2.2),

$$(S2.1) \quad P_\lambda(\theta) := \begin{cases} \lambda\theta - \frac{\theta^2}{2a} & \text{if } 0 \leq \theta \leq a\lambda \\ \frac{1}{2}a\lambda^2 & \text{if } \theta > a\lambda \end{cases}$$

Define

$$F(\theta) := \min_{\kappa \in [0, a\lambda]} \frac{1}{2a}\kappa^2 - \frac{1}{a}\theta\kappa + \theta\lambda$$

and we want to show that  $F(\theta) = P_\lambda(\theta)$ . Observe that, for any  $\theta \geq 0$ ,

$$(S2.2) \quad F(\theta) = \min_{\kappa \in [0, a\lambda]} \frac{1}{2a}\kappa^2 - \frac{1}{a}\theta\kappa + \theta\lambda = \min_{\kappa \in [0, a\lambda]} \frac{1}{2a}(\kappa - \theta)^2 - \frac{\theta^2}{2a} + \theta\lambda$$

whose closed form solution  $\kappa^*$  is given as

$$\kappa^* := \begin{cases} \theta & \text{if } 0 \leq \theta \leq a\lambda \\ a\lambda & \text{if } \theta > a\lambda \end{cases}$$

Replacing  $\kappa$  by the minimizer  $\kappa^*$  in (S2.2), we can drop the minimization operator “min”. Then this easily leads to the equality,  $F(\theta) = P_\lambda(\theta)$ . This immediately results in both (a) and (b).

**S3. Proof for Lemma 4.1.**

PROOF. Note that  $\frac{64k\tau \log d}{n} + \mu \leq \alpha$ . In view of (4.2), we have for all  $\|\beta' - \beta''\|_2 \leq 3$ :

$$\begin{aligned} & L(\beta') - L(\beta'') - \langle \nabla_{\beta} L(\beta''), \beta' - \beta'' \rangle \\ & \geq \alpha_1 \|\beta' - \beta''\|_2^2 - \tau_1 \frac{\log d}{n} |\beta' - \beta''|^2 \\ & \geq \left( \frac{64k\tau \log d}{n} + \mu \right) \|\beta' - \beta''\|_2^2 - \tau \frac{\log d}{n} |\beta' - \beta''|^2. \end{aligned}$$

Observe that for all  $(\beta', \beta'') \in \{(\beta', \beta'') : \|\beta' - \beta''\|_0 \leq 64k - 1\}$ , we have

$$\tau \frac{\log d}{n} |\beta' - \beta''|^2 \leq (64k - 1) \tau \frac{\log d}{n} \|\beta' - \beta''\|_2^2.$$

Thus for all  $(\beta', \beta'') \in \{(\beta', \beta'') : \|\beta' - \beta''\|_2 \leq 3, \|\beta' - \beta''\|_0 \leq 64k - 1\}$

$$\begin{aligned} (S3.1) \quad L(\beta') - L(\beta'') & \geq \langle \nabla L(\beta''), \beta' - \beta'' \rangle + \left( \frac{64k\tau \log d}{n} + \mu \right) \|\beta' - \beta''\|_2^2 \\ & \quad - \frac{\tau(64k - 1) \log d}{n} \|\beta' - \beta''\|_2^2 \\ & \geq \langle \nabla L(\beta''), \beta' - \beta'' \rangle + \left( \frac{\tau \log d}{n} + \mu \right) \|\beta' - \beta''\|_2^2 \end{aligned}$$

Notice that per Taylor expansion we have that for some  $\chi \in [\beta', \beta'']$

$$(S3.2) \quad L(\beta') - L(\beta'') = \langle \nabla L(\beta''), \beta' - \beta'' \rangle + \frac{1}{2} \langle \beta' - \beta'', [\nabla^2 L(\chi)]^{\top} (\beta' - \beta'') \rangle$$

Thus, combining (S3.1) and (S3.2), we obtain that for all  $(\beta', \beta'') \in \{(\beta', \beta'') : \|\beta' - \beta''\|_2 \leq 3, \|\beta' - \beta''\|_0 \leq 64k - 1\}$ ,

$$\frac{1}{2} \langle \beta' - \beta'', [\nabla^2 L(\chi)]^{\top} (\beta' - \beta'') \rangle \geq \left( \frac{\tau \log d}{n} + \mu \right) \|\beta' - \beta''\|_2^2.$$

Further notice  $\nabla^2 L = \frac{X^{\top} X}{n}$ . Then it follows that for all  $c \in \mathbb{R}_+, \forall (\beta', \beta'') \in \{(\beta', \beta'') : \|\beta' - \beta''\|_2 \leq 3, \|\beta' - \beta''\|_0 \leq 64k - 1\}$ ,

$$\frac{1}{2n} \langle c(\beta' - \beta''), X^{\top} X [c(\beta' - \beta'')] \rangle \geq \left( \frac{\tau \log d}{n} + \mu \right) \|c(\beta' - \beta'')\|_2^2.$$

This implies that for all  $(\beta', \beta'') \in \{(\beta', \beta'') : \|\beta' - \beta''\|_0 \leq 64k - 1\}$ , and  $\chi \in [\beta', \beta'']$ ,

$$(S3.3) \quad \begin{aligned} & \frac{1}{2} \langle \beta' - \beta'', [\nabla^2 L(\chi)]^\top (\beta' - \beta'') \rangle \\ &= \frac{1}{2n} \langle \beta' - \beta'', X^\top X (\beta' - \beta'') \rangle \geq \left( \frac{\tau \log d}{n} + \mu \right) \|\beta' - \beta''\|_2^2, \end{aligned}$$

which, combining with (S3.2), gives that

$$L(\beta') - L(\beta'') \geq \langle \nabla L(\beta''), \beta' - \beta'' \rangle + \left( \frac{\tau \log d}{n} + \mu \right) \|\beta' - \beta''\|_2^2$$

for all  $(\beta', \beta'') \in \{(\beta', \beta'') : \|\beta' - \beta''\|_0 \leq 64k - 1\}$ .

As an immediate result,

$$(S3.4) \quad \begin{aligned} & L(\beta') - \mu \|\beta'\|_2^2 - L(\beta'') + \mu \|\beta''\|_2^2 \\ & \geq \langle \nabla L(\beta''), \beta' - \beta'' \rangle + \left( \frac{\tau \log d}{n} + \mu \right) \|\beta' - \beta''\|_2^2 - \mu \|\beta'\|_2^2 + \mu \|\beta''\|_2^2 \\ & = \langle \nabla L(\beta'') - 2\mu\beta'', \beta' - \beta'' \rangle + \left( \frac{\tau \log d}{n} + \mu \right) \|\beta' - \beta''\|_2^2 - \mu \|\beta'\|_2^2 \\ & \quad + \mu \|\beta''\|_2^2 + 2\mu \langle \beta'', \beta' - \beta'' \rangle. \end{aligned}$$

Notice that

$$(S3.5) \quad \mu \|\beta' - \beta''\|_2^2 - \mu \|\beta'\|_2^2 + \mu \|\beta''\|_2^2 + 2\mu \langle \beta'', \beta' - \beta'' \rangle = 0.$$

Combining (S3.4) and (S3.5), we obtain

$$(S3.6) \quad \begin{aligned} & L(\beta') - \mu \|\beta'\|_2^2 - L(\beta'') + \mu \|\beta''\|_2^2 \\ & \geq \langle \nabla L(\beta'') - 2\mu\beta'', \beta' - \beta'' \rangle + \frac{\tau \log d}{n} \|\beta' - \beta''\|_2^2. \end{aligned}$$

for all  $(\beta', \beta'') \in \{(\beta', \beta'') : \|\beta' - \beta''\|_0 \leq 64k - 1\}$ . It is easy to check that  $\sum_{i=1}^d P_\lambda(|\beta_i|) - \lambda|\beta|$  is continuously differentiable in  $\beta$ . Denote that  $\mathcal{G}(\beta) := \frac{\partial[\sum_{i=1}^d P_\lambda(|\beta_i|) - \lambda|\beta|]}{\partial \beta}$ . Invoking the assumption that  $\mu \|\beta\|_2^2 + \sum_{i=1}^d P_\lambda(|\beta_i|)$  is convex, we know that, for all  $(\beta', \beta'') \in \{(\beta', \beta'') : \|\beta' - \beta''\|_0 \leq 64k - 1\}$ :

$$(S3.7) \quad \begin{aligned} & \mu \|\beta'\|_2^2 + \sum_{i=1}^d P_\lambda(|\beta'_i|) - \mu \|\beta''\|_2^2 - \sum_{i=1}^d P_\lambda(|\beta''_i|) \\ & \geq \langle 2\mu\beta'' + \mathcal{G}(\beta'') + \mathcal{D}(\beta''), \beta' - \beta'' \rangle \end{aligned}$$

where  $\mathcal{D}(\beta'') \in \lambda[\partial|\beta|]_{\beta=\beta''}$  is a subgradient of  $\lambda|\cdot|$  at  $\beta''$  and  $\partial|\cdot|$  is the subdifferential of  $\lambda|\cdot|$ . Combining (S3.6) and (S3.7), we have

$$\begin{aligned} & \frac{\mathcal{L}(\beta')}{n} - \frac{\mathcal{L}(\beta'')}{n} \\ &= L(\beta') + \sum_{i=1}^d P_\lambda(|\beta'_i|) - L(\beta'') - \sum_{i=1}^d P_\lambda(|\beta''_i|) \\ &\geq \langle \nabla L(\beta'') + \mathcal{G}(\beta'') + \mathcal{D}(\beta''), \beta' - \beta'' \rangle + \frac{\tau \log d}{n} \|\beta' - \beta''\|_2^2. \end{aligned}$$

Observe that, by definition,  $\nabla L(\beta'') + \mathcal{G}(\beta'') = \nabla \tilde{L}(\beta'')$ , where  $\tilde{L}$  is defined as in (4.3). Therefore, we have the desired result.  $\square$

**S4. Extended Numerical Results for Comparison in Optimization Quality.** This section of the appendix presents extended numerical results that complete Table 4. More specifically, Table S1 extends the LR-SCAD case (in the upper panel) of Table 4 and Table S2 extends the LR-MCP case (in the lower panel) of Table 4.

DEPARTMENT OF INDUSTRIAL  
AND MANUFACTURING ENGINEERING  
PENNSYLVANIA STATE UNIVERSITY  
STATE COLLEGE, PA 16802 USA  
E-MAIL: [hq15143@psu.edu](mailto:hq15143@psu.edu)  
[taoyao@psu.edu](mailto:taoyao@psu.edu)

DEPARTMENT OF STATISTICS  
PENNSYLVANIA STATE UNIVERSITY  
STATE COLLEGE, PA 16802 USA  
E-MAIL: [rzli@psu.edu](mailto:rzli@psu.edu)

TABLE S1  
*Extended results for the upper panel of Table 4 on comparison between LLA and the proposed MIPGO to solve LR-SCAD*

|            |      | MIPGO   | LLA <sub>r</sub> | gap(%)      | LLA <sub>0</sub> | gap(%)      | LLA <sub>1</sub> | gap(%)      |
|------------|------|---------|------------------|-------------|------------------|-------------|------------------|-------------|
| TS 1       | Min. | 67.01   | 67.01            | <b>0.00</b> | 83.24            | 19.50       | 88.84            | 24.57       |
| $d = 10$   | Ave. | 67.01   | 84.44            | 20.64       | 83.24            | 19.50       | 88.84            | 24.57       |
| $n = 10$   | Max. | 67.01   | 120.30           | 44.30       | 83.24            | 19.50       | 88.84            | 24.57       |
| TS 2       | Min. | 76.15   | 76.15            | <b>0.00</b> | 76.15            | <b>0.00</b> | 106.02           | 28.16       |
| $d = 10$   | Ave. | 76.15   | 93.58            | 18.63       | 76.15            | <b>0.00</b> | 106.02           | 28.16       |
| $n = 10$   | Max. | 76.15   | 113.86           | 33.12       | 76.15            | <b>0.00</b> | 106.02           | 28.16       |
| TS 4       | Min. | 90.58   | 92.88            | 2.48        | 106.05           | 14.59       | 90.58            | <b>0.00</b> |
| $d = 20$   | Ave. | 90.58   | 110.35           | 17.91       | 106.05           | 14.59       | 90.58            | <b>0.00</b> |
| $n = 10$   | Max. | 90.58   | 149.19           | 39.29       | 106.05           | 14.59       | 90.58            | <b>0.00</b> |
| TS 5       | Min. | 64.98   | 64.98            | <b>0.00</b> | 64.98            | <b>0.00</b> | 107.19           | 39.38       |
| $d = 20$   | Ave. | 64.98   | 86.10            | 24.53       | 64.98            | <b>0.00</b> | 107.19           | 39.38       |
| $n = 10$   | Max. | 64.98   | 167.61           | 61.23       | 64.98            | <b>0.00</b> | 107.19           | 39.38       |
| TS 7       | Min. | 132.04  | 132.04           | <b>0.00</b> | 162.05           | 18.52       | 168.77           | 21.76       |
| $d = 40$   | Ave. | 132.04  | 181.12           | 27.10       | 162.05           | 18.52       | 190.76           | 21.76       |
| $n = 15$   | Max. | 132.04  | 284.86           | 53.65       | 162.05           | 18.52       | 190.76           | 21.76       |
| TS 8       | Min. | 146.79  | 146.79           | <b>0.00</b> | 165.00           | 11.03       | 146.79           | <b>0.00</b> |
| $d = 40$   | Ave. | 146.79  | 196.85           | 25.43       | 165.00           | 11.03       | 146.79           | <b>0.00</b> |
| $n = 15$   | Max. | 146.79  | 291.78           | 49.69       | 165.00           | 11.03       | 146.79           | <b>0.00</b> |
| TS 10      | Min. | 702.54  | 702.54           | <b>0.00</b> | 830.80           | 15.44       | 830.80           | 15.44       |
| $d = 200$  | Ave. | 702.54  | 788.15           | 10.86       | 830.80           | 15.44       | 830.80           | 15.44       |
| $n = 60$   | Max. | 702.54  | 866.43           | 18.92       | 830.80           | 15.44       | 830.80           | 15.44       |
| TS 11      | Min. | 782.59  | 905.47           | 13.57       | 914.25           | 14.40       | 782.59           | <b>0.00</b> |
| $d = 200$  | Ave. | 782.59  | 1026.62          | 23.77       | 914.25           | 14.40       | 782.59           | <b>0.00</b> |
| $n = 60$   | Max. | 782.59  | 1332.02          | 41.25       | 914.25           | 14.40       | 782.59           | <b>0.00</b> |
| TS 13      | Min. | 962.10  | 1032.77          | 6.84        | 1225.51          | 21.49       | 1135.80          | 15.29       |
| $d = 500$  | Ave. | 962.10  | 1187.43          | 18.98       | 1225.51          | 21.49       | 1135.80          | 15.29       |
| $n = 80$   | Max. | 962.10  | 1252.43          | 23.18       | 1225.51          | 21.49       | 1135.80          | 15.29       |
| TS 14      | Min. | 703.79  | 703.79           | <b>0.00</b> | 921.93           | 23.66       | 892.53           | 21.15       |
| $d = 500$  | Ave. | 703.79  | 914.86           | 23.07       | 921.93           | 23.66       | 892.53           | 21.15       |
| $n = 80$   | Max. | 703.79  | 1321.40          | 46.74       | 921.93           | 23.66       | 892.53           | 21.15       |
| TS 16      | Min. | 1037.19 | 1037.19          | <b>0.00</b> | 1246.49          | 16.79       | 1246.49          | 16.79       |
| $d = 1000$ | Ave. | 1037.19 | 1200.53          | 13.61       | 1246.49          | 16.79       | 1246.49          | 16.79       |
| $n = 100$  | Max. | 1037.19 | 1400.49          | 25.94       | 1246.49          | 16.79       | 1246.49          | 16.79       |
| TS 17      | Min. | 1036.06 | 1036.06          | <b>0.00</b> | 1413.73          | 27.55       | 1413.73          | 26.71       |
| $d = 1000$ | Ave. | 1036.06 | 1276.52          | 18.84       | 1413.73          | 27.55       | 1413.73          | 26.71       |
| $n = 100$  | Max. | 1036.06 | 1429.95          | 27.55       | 1413.73          | 27.55       | 1413.73          | 26.71       |

TABLE S2  
*Extended results for the lower panel of Table 4 on comparison between LLA and the proposed MIPGO to solve LR-MCP*

|            |      | MIPGO  | LLA <sub>r</sub> | gap(%)      | LLA <sub>0</sub> | gap(%)      | LLA <sub>1</sub> | gap(%) |
|------------|------|--------|------------------|-------------|------------------|-------------|------------------|--------|
| TS 1       | Min. | 10.23  | 20.48            | 32.03       | 13.46            | 24.04       | 15.04            | 32.03  |
| $d = 10$   | Ave. | 10.23  | 23.03            | 37.99       | 13.46            | 24.04       | 15.04            | 32.03  |
| $n = 10$   | Max. | 10.23  | 30.63            | 55.02       | 13.46            | 24.04       | 15.04            | 32.03  |
| TS 2       | Min. | 19.21  | 20.48            | 6.19        | 23.52            | 18.31       | 22.50            | 14.61  |
| $d = 10$   | Ave. | 19.21  | 23.03            | 16.58       | 23.52            | 18.31       | 22.50            | 14.61  |
| $n = 10$   | Max. | 19.21  | 30.63            | 37.27       | 23.52            | 18.31       | 22.50            | 14.61  |
| TS 4       | Min. | 14.18  | 17.52            | 19.10       | 17.88            | 20.71       | 22.51            | 37.02  |
| $d = 20$   | Ave. | 14.18  | 26.05            | 45.57       | 17.88            | 20.71       | 22.51            | 37.02  |
| $n = 10$   | Max. | 14.18  | 35.00            | 59.50       | 17.88            | 20.71       | 22.51            | 37.02  |
| TS 5       | Min. | 13.54  | 17.61            | 23.09       | 15.79            | 14.21       | 25.00            | 45.83  |
| $d = 20$   | Ave. | 13.54  | 26.44            | 48.78       | 15.79            | 14.21       | 25.00            | 45.83  |
| $n = 10$   | Max. | 13.54  | 42.50            | 68.14       | 15.79            | 14.21       | 25.00            | 45.83  |
| TS 7       | Min. | 32.05  | 39.03            | 17.88       | 32.05            | <b>0.00</b> | 48.76            | 34.28  |
| $d = 40$   | Ave. | 32.05  | 48.73            | 34.24       | 32.05            | <b>0.00</b> | 48.76            | 34.28  |
| $n = 15$   | Max. | 32.05  | 71.25            | 55.02       | 32.05            | <b>0.00</b> | 48.76            | 34.28  |
| TS 8       | Min. | 29.28  | 32.97            | 11.18       | 31.87            | 8.11        | 41.49            | 29.41  |
| $d = 40$   | Ave. | 29.28  | 43.23            | 32.27       | 31.87            | 8.11        | 41.49            | 29.41  |
| $n = 15$   | Max. | 29.28  | 56.25            | 47.94       | 31.87            | 8.11        | 41.49            | 29.41  |
| TS 10      | Min. | 119.06 | 130.46           | 8.73        | 122.72           | 2.98        | 130.46           | 8.73   |
| $d = 200$  | Ave. | 119.06 | 156.16           | 24.76       | 122.72           | 2.98        | 130.46           | 8.73   |
| $n = 60$   | Max. | 119.06 | 550.37           | 78.37       | 122.72           | 2.98        | 130.46           | 8.73   |
| TS 11      | Min. | 118.83 | 124.04           | 4.20        | 157.43           | 24.52       | 124.04           | 4.20   |
| $d = 200$  | Ave. | 118.83 | 136.78           | 13.13       | 157.43           | 24.52       | 124.04           | 4.20   |
| $n = 60$   | Max. | 118.83 | 201.01           | 40.89       | 157.43           | 24.52       | 124.04           | 4.20   |
| TS 13      | Min. | 155.77 | 171.67           | 9.26        | 155.77           | <b>0.00</b> | 176.95           | 11.97  |
| $d = 500$  | Ave. | 155.77 | 184.67           | 15.65       | 155.77           | <b>0.00</b> | 176.95           | 11.97  |
| $n = 80$   | Max. | 155.77 | 355.23           | 56.15       | 155.77           | <b>0.00</b> | 176.95           | 11.97  |
| TS 14      | Min. | 167.06 | 171.33           | 2.50        | 194.65           | 14.18       | 186.32           | 10.34  |
| $d = 500$  | Ave. | 167.06 | 198.97           | 16.04       | 194.65           | 14.18       | 186.32           | 10.34  |
| $n = 80$   | Max. | 167.06 | 250.78           | 33.39       | 194.65           | 14.18       | 186.32           | 10.34  |
| TS 16      | Min. | 201.65 | 212.05           | 4.91        | 212.05           | 4.91        | 265.49           | 24.05  |
| $d = 1000$ | Ave. | 201.65 | 223.29           | 9.69        | 212.05           | 4.91        | 265.49           | 24.05  |
| $n = 100$  | Max. | 201.65 | 265.49           | 24.05       | 212.05           | 4.91        | 265.49           | 24.05  |
| TS 17      | Min. | 139.16 | 139.16           | <b>0.00</b> | 139.16           | <b>0.00</b> | 162.25           | 14.23  |
| $d = 1000$ | Ave. | 139.16 | 156.37           | 11.00       | 139.16           | <b>0.00</b> | 162.25           | 14.23  |
| $n = 100$  | Max. | 139.16 | 283.85           | 50.98       | 139.16           | <b>0.00</b> | 162.25           | 14.23  |
